# Supplementary figures and images for: Overexpression of FBXO17 Promotes the Proliferation, Migration and Invasion of Glioma Cells Through the Akt/GSK-3β/Snail Pathway
Source: PubMed Central journal article supplement — Cell Transplant. 2021 Apr 14;30:09636897211007395. doi: 10.1177/09636897211007395 (PMC8058804; doi:10.1177/09636897211007395), 2021-04-14

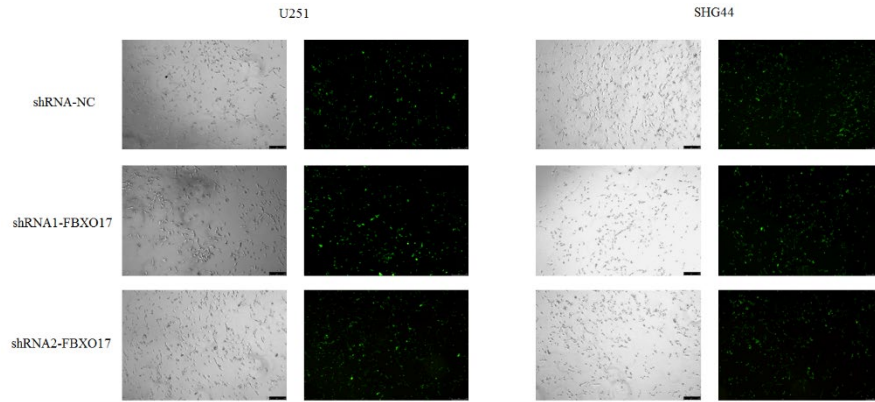

Figure 1

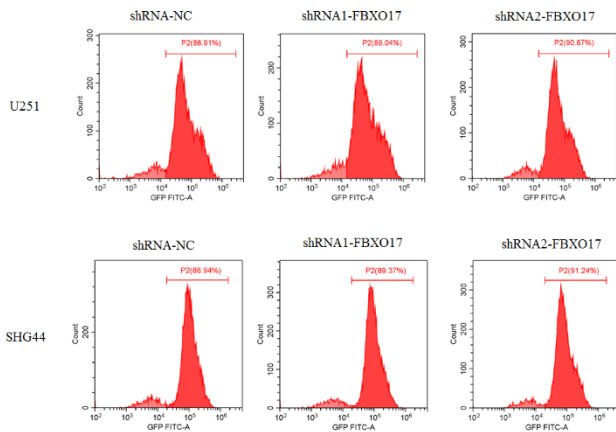

Figure 2

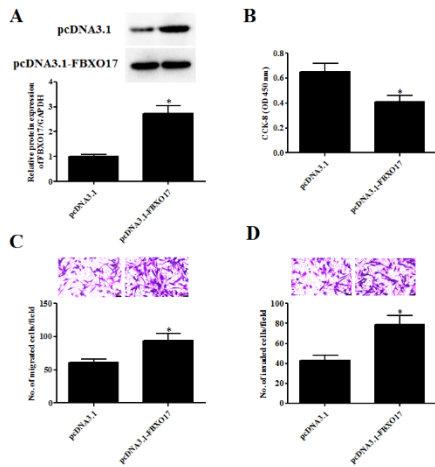

Figure 3

Supplement: sj-pdf-1-cll-10.1177_09636897211007395.pdf [file sj-pdf-1-cll-10.1177_09636897211007395.pdf]
